# Supplementary material
Source: PubMed Central journal article supplement (PMC3993164)
Supplement: AEM.04105-13_zam999105254so1.pdf [file AEM.04105-13_zam999105254so1.pdf]

## **SUPPLEMENTAL MATERIAL**

**for manuscript entitled**

**“Polysaccharides and proteins added to flowing drinking water at  
microgram-per-liter levels promote the formation of biofilms  
predominated by *Bacteroidetes* and *Proteobacteria*”**

Eveline L.W. Sack, Paul W.J.J. van der Wielen,\* and Dick van der Kooij

### **Running Title**

Biopolymer utilization at  $\mu\text{g l}^{-1}$  levels by biofilms

### **Affiliation Authors**

KWR Watercycle Research Institute  
P.O. Box 1072, 3430 BB Nieuwegein  
The Netherlands

### **\* Corresponding Author**

KWR Watercycle Research Institute  
P.O. Box 1072, 3430 BB Nieuwegein  
The Netherlands

Telephone number: +31 (0)30 60 69 642

Email address: [Paul.van.der.Wielen@kwrwater.nl](mailto:Paul.van.der.Wielen@kwrwater.nl)

## **SECTION: RESULTS**

Table S1. Experiments (A – D) conducted to assess biofilm formation on glass cylindrical rings exposed to continuously flowing tap water with added biopolymers at  $\mu\text{g C l}^{-1}$  levels in a biofilm monitor.

| Expt no.          | Compound(s) added           | Duration and concentration of addition |                                                               |
|-------------------|-----------------------------|----------------------------------------|---------------------------------------------------------------|
|                   |                             | <i>Period (day)</i>                    | <i>Concentration</i>                                          |
| A1                | Blank                       | 0 – 69                                 | No compounds added                                            |
| A2                | Maltose                     | 0 – 32                                 | 10 $\mu\text{g mal-C l}^{-1}$                                 |
| A3 <i>Phase 1</i> | Amylopectin <sup>a</sup> or | 0 – 39                                 | 10 $\mu\text{g amp-C l}^{-1}$                                 |
| <i>Phase 2</i>    | Maltose & amylopectin       | 39 – 69                                | 10 $\mu\text{g mal-C l}^{-1}$ & 10 $\mu\text{g amp-C l}^{-1}$ |
| A4                | Maltose & amylopectin       | 0 – 32                                 | 10 $\mu\text{g mal-C l}^{-1}$ & 10 $\mu\text{g amp-C l}^{-1}$ |
| B1                | Blank                       | 0 – 86                                 | No compounds added                                            |
| B2 <i>Phase 1</i> | Acetate (ac)                | 0 – 57                                 | 3.0 $\mu\text{g ac-C l}^{-1}$                                 |
| <i>Phase 2</i>    |                             | 57 – 86                                | 4.5 $\mu\text{g ac-C l}^{-1}$                                 |
| B3                | Amylopectin                 | 0 – 86                                 | 10 $\mu\text{g amp-C l}^{-1}$                                 |
| B4 <i>Phase 1</i> | Acetate                     | 0 – 31                                 | 3.0 $\mu\text{g ac-C l}^{-1}$                                 |
| <i>Phase 2</i>    | Acetate & amylopectin       | 31 – 57                                | 3.0 $\mu\text{g ac-C l}^{-1}$ & 10 $\mu\text{g amp-C l}^{-1}$ |
| <i>Phase 3</i>    | Acetate & amylopectin       | 57 – 86                                | 4.5 $\mu\text{g ac-C l}^{-1}$ & 10 $\mu\text{g amp-C l}^{-1}$ |
| C1                | Blank                       | 0 – 52                                 | No compounds added                                            |
| C2                | Acetate                     | 0 – 52                                 | 10 $\mu\text{g ac-C l}^{-1}$                                  |
| C3                | Amylopectin                 | 0 – 52                                 | 10 $\mu\text{g amp-C l}^{-1}$                                 |
| C4 <i>Phase 1</i> | Acetate                     | 0 – 20                                 | 10 $\mu\text{g ac-C l}^{-1}$                                  |
| <i>Phase 2</i>    | Acetate & amylopectin       | 20 – 52                                | 10 $\mu\text{g ac-C l}^{-1}$ & 10 $\mu\text{g amp-C l}^{-1}$  |
| D1                | Blank                       | 0 – 88                                 | No compounds added                                            |
| D2                | Caseinate <sup>a</sup>      | 0 – 82                                 | 10 $\mu\text{g cas-C l}^{-1}$                                 |
| D3                | Gelatin <sup>a</sup>        | 0 – 88                                 | 10 $\mu\text{g gel-C l}^{-1}$                                 |
| D4                | Laminarin <sup>a</sup>      | 0 – 82                                 | 10 $\mu\text{g lam-C l}^{-1}$                                 |

<sup>a</sup> Amylopectin from corn; casein sodium salt from bovine milk; gelatin type B from bovine skin; laminarin from *Laminaria digitata* (Sigma-Aldrich, Germany).

Table S2. Parameters of biofilm formation with organic compounds added to tap water at  $\mu\text{g C l}^{-1}$  levels <sup>a</sup>.

| Exp no. | Added compound(s) & concn                                     | Fe accumulation rate                      | FeC <sub>max</sub>           |     | Avg temp of                      | Avg ATP content                     |
|---------|---------------------------------------------------------------|-------------------------------------------|------------------------------|-----|----------------------------------|-------------------------------------|
|         |                                                               | during biofilm formation $\pm$ SE         | day                          | day | feed water $\pm$ SD <sup>f</sup> | in feed water $\pm$ SD <sup>f</sup> |
|         |                                                               | ( $\mu\text{g Fe pg ATP}^{-1}$ )          | ( $\mu\text{g Fe cm}^{-2}$ ) |     | ( $^{\circ}\text{C}$ )           | ( $\text{ng l}^{-1}$ )              |
| A1      | None                                                          | 39 $\pm$ 4                                | 12 <sup>e</sup>              | 69  |                                  |                                     |
| A2      | 10 $\mu\text{g mal-C l}^{-1}$                                 | 4.7 $\pm$ 0.4                             | 8.8                          | 18  |                                  |                                     |
| A3.1    | 10 $\mu\text{g amp-C l}^{-1}$                                 | n.d. <sup>b</sup>                         | 2.6                          | 39  |                                  |                                     |
| A3.2    | 10 $\mu\text{g mal-C l}^{-1}$ & 10 $\mu\text{g amp-C l}^{-1}$ | 4.1 $\pm$ 1.1                             | 50                           | 69  | 18.1 $\pm$ 1.2<br>(n = 39)       | 4.4 $\pm$ 1.4<br>(n = 39)           |
| A4      | 10 $\mu\text{g mal-C l}^{-1}$ & 10 $\mu\text{g amp-C l}^{-1}$ | 4.7 $\pm$ 0.5; 3.8 $\pm$ 0.5 <sup>c</sup> | 47                           | 28  |                                  |                                     |
| B1      | None                                                          | 29 $\pm$ 3                                | 12                           | 86  |                                  |                                     |
| B2.1    | 3.0 $\mu\text{g ac-C l}^{-1}$                                 |                                           | n.d.                         | -   |                                  |                                     |
| B2.2    | 4.5 $\mu\text{g ac-C l}^{-1}$                                 | 6.3 $\pm$ 0.7 <sup>d</sup>                | 28                           | 86  |                                  |                                     |
| B3      | 10 $\mu\text{g amp-C l}^{-1}$                                 | n.d. <sup>b</sup>                         | 11                           | 86  | 15.6 $\pm$ 1.0<br>(n = 23)       | 3.9 $\pm$ 1.02<br>(n = 23)          |
| B4.1    | 3.0 $\mu\text{g ac-C l}^{-1}$                                 |                                           | n.d.                         | -   |                                  |                                     |
| B4.2    | 3.0 $\mu\text{g ac-C l}^{-1}$ & 10 $\mu\text{g amp-C l}^{-1}$ | 4.8 $\pm$ 0.6 <sup>d</sup>                | n.d.                         | -   |                                  |                                     |
| B4.3    | 4.5 $\mu\text{g ac-C l}^{-1}$ & 10 $\mu\text{g amp-C l}^{-1}$ |                                           | 31                           | 86  |                                  |                                     |
| C1      | None                                                          | 13 $\pm$ 0.1                              | 2.2                          | 46  |                                  |                                     |
| C2      | 10 $\mu\text{g ac-C l}^{-1}$                                  | 1.6 $\pm$ 0.2                             | 29                           | 48  |                                  |                                     |
| C3      | 10 $\mu\text{g amp-C l}^{-1}$                                 | 11 $\pm$ 1                                | 2.1                          | 46  | 11.8 $\pm$ 1.0<br>(n = 20)       | 3.8 $\pm$ 1.4<br>(n = 20)           |
| C4.1    | 10 $\mu\text{g ac-C l}^{-1}$                                  |                                           |                              |     |                                  |                                     |
| B4.2    | 10 $\mu\text{g ac-C l}^{-1}$ & 10 $\mu\text{g amp-C l}^{-1}$  | 1.7 $\pm$ 0.2 <sup>d</sup>                | 28                           | 48  |                                  |                                     |

Table S2. Continued

|    |                               |               |    |    |                |               |
|----|-------------------------------|---------------|----|----|----------------|---------------|
| D1 | None                          | $34 \pm 1.9$  | 12 | 88 |                |               |
| D2 | 10 $\mu\text{g cas-C l}^{-1}$ | $8.3 \pm 1.4$ | 31 | 75 | $14.6 \pm 1.6$ | $3.9 \pm 1.1$ |
| D3 | 10 $\mu\text{g gel-C l}^{-1}$ | $6.7 \pm 0.8$ | 22 | 88 | (n = 48)       | (n = 48)      |
| D4 | 10 $\mu\text{g lam-C l}^{-1}$ | $9.2 \pm 1.4$ | 22 | 75 |                |               |

<sup>a</sup> Iron accumulation as a function of biofilm concentration, with standard error (SE);  $\text{FeC}_{\text{max}}$ , maximum iron concentration on glass ring, with standard deviation (SD), and day on which  $\text{FeC}_{\text{max}}$  was measured;  $r^2$ , correlation coefficient of linear regression.

<sup>b</sup> Not determined because not enough data were available for calculation.

<sup>c</sup> Fe accumulation before and after day 12.

<sup>d</sup> Fe accumulation during all two or three phases of the experiment.

<sup>e</sup> Fe concentration was approximately 2 to 3  $\mu\text{g Fe cm}^{-2}$  between day 14 to 30 and 6  $\mu\text{g Fe cm}^{-2}$  around day 40.

<sup>f</sup> n = number of measurements used to calculate the average and SD.

Table S3. Classification of OTUs clustering with bacteria obtained from biofilms formed with blank tap water (BBL) and tap water with added maltose (BMAL), amylopectin (BAP), maltose & amylopectin (BMA+AP), acetate (BAC), acetate and amylopectin (BAC+AP), gelatin (BGEL), caseinate (BCAS), or laminarin (BLAM) at  $\mu\text{g C l}^{-1}$  levels. Single-clone OTUs present in one out of nine biofilm types have been excluded.

| Organism(s) with highest similarity (GenBank accession no.)<br>classified according to lineage                                                                                         | Similarity<br>(%) | No. of clones per OTU in biofilm sample |             |            |                |            |                |             |             |             |
|----------------------------------------------------------------------------------------------------------------------------------------------------------------------------------------|-------------------|-----------------------------------------|-------------|------------|----------------|------------|----------------|-------------|-------------|-------------|
|                                                                                                                                                                                        |                   | BBL<br>t82                              | BMAL<br>t24 | BAP<br>t86 | BMA+<br>AP t24 | BAC<br>t86 | BAC+<br>AP t86 | BGEL<br>t88 | BCAS<br>t82 | BLAM<br>t82 |
| <b>Actinobacteria; Miscellaneous</b>                                                                                                                                                   |                   |                                         |             |            |                |            |                |             |             |             |
| Uncultured actinobacterium clone Elev_16S_853 (EF019692) /<br>uncultured Acidothermaceae bacterium clone Elev_16S_1288<br>(EF019917)                                                   | 99/98             | 2                                       | -           | -          | -              | -          | -              | -           | -           | -           |
| Uncultured bacterium clone V201-13 (HQ114028) / Uncultured<br>actinobacterium AUVE_14A12 (EF651635)                                                                                    | 95/91             | 1                                       | -           | 1          | -              | -          | -              | -           | -           | -           |
| Uncultured bacterium GC55 (AJ271048) / Uncultured actinobacterium<br>clone AUVE_14A12 (EF651635)                                                                                       | 97/92             | -                                       | 1           | 1          | -              | -          | -              | -           | -           | -           |
| Uncultured bacterium clone AK4DE1_05H (GQ397037) / Uncultured<br>actinobacterium clone AL5.80 (GU047499)                                                                               | 99/99             | -                                       | -           | -          | -              | -          | 1              | -           | -           | 1           |
| Uncultured Actinobacteria bacterium clone QEEA1AG12 (CU918623)                                                                                                                         | 93                | -                                       | -           | -          | -              | -          | -              | 1           | -           | 1           |
| Uncultured actinobacterium clone Elev_16S_853 (EF019692)                                                                                                                               | 98                | -                                       | -           | -          | -              | -          | -              | 1           | -           | 1           |
| <b>Bacteroidetes; Cytophagia; Cytophagales; Cytophagaceae</b>                                                                                                                          |                   |                                         |             |            |                |            |                |             |             |             |
| Uncultured Bacteroidetes clone MEsp06cnp11A7 (FJ828175) /<br>Uncultured bacterium clone Granotes_C-B3-9O7R (FN297643) /<br>Uncultured <i>Emticicia</i> sp. clone cuticle_12 (HQ111160) | 99/99/97          | -                                       | 7           | -          | 5              | -          | -              | -           | -           | -           |
| Uncultured bacterium clone Granotes_C-B3-9O7R (FN297643) /<br>Uncultured Bacteroidetes clone MEsp06cnp11C11 (FJ828202) /<br><i>Emticicia</i> sp. DC2b-1 (AB552862)                     | 99/99/93          | -                                       | 2           | -          | -              | -          | -              | -           | -           | -           |
| Uncultured bacterium clone 01F_F1_E25 (GU568965) / <i>Leadbetterella</i><br>sp. HME6675 (HM590831)                                                                                     | 99/97             | -                                       | 3           | -          | -              | -          | -              | -           | -           | -           |
| Uncultured bacterium clone mdt15e10 (AY536973) / <i>Pontibacter</i> sp.<br>strain R-36965 (FR691450)                                                                                   | 98/85             | -                                       | -           | -          | -              | -          | -              | -           | 2           | -           |

Table S3. Continued

| Organism(s) with highest similarity (GenBank accession no.)<br>classified according to lineage                                                                 | Similarity<br>(%) | No. of clones per OTU in biofilm sample |             |            |                |            |                |             |             |             |
|----------------------------------------------------------------------------------------------------------------------------------------------------------------|-------------------|-----------------------------------------|-------------|------------|----------------|------------|----------------|-------------|-------------|-------------|
|                                                                                                                                                                |                   | BBL<br>t82                              | BMAL<br>t24 | BAP<br>t86 | BMA+<br>AP t24 | BAC<br>t86 | BAC+<br>AP t86 | BGEL<br>t88 | BCAS<br>t82 | BLAM<br>t82 |
| <b>Bacteroidetes; Flavobacteria; Flavobacteriales; Cryomorphaceae &amp; Flavobacteriaceae</b>                                                                  |                   |                                         |             |            |                |            |                |             |             |             |
| <i>Flavobacterium</i> sp. HME6012 (HM149211)                                                                                                                   | 99                | -                                       | 3           | -          | 6              | -          | -              | -           | -           | -           |
| <i>Flavobacterium</i> sp. CL1.152 (AM934685) / <i>Flavobacterium succinicans</i> strain DSM 4003 (AM230493)                                                    | 99/98             | -                                       | -           | -          | 5              | -          | -              | -           | -           | 1           |
| Uncultured <i>Flavobacterium</i> sp. clone L-1 (JF703584)                                                                                                      | 98                | -                                       | -           | -          | -              | -          | -              | 1           | 1           | -           |
| Uncultured Bacteroidetes bacterium clone MA194T1-3r5_E10 (GQ469392) / <i>Flavobacterium</i> sp. KOPRI 25152 (FJ544919)                                         | 97/97             | -                                       | -           | -          | -              | -          | 2              | -           | -           | -           |
| <i>Flavobacterium</i> sp. HME6133 (HM776988) / <i>Flavobacterium aquatile</i> NBRC 15052 (AB517711)                                                            | 98/97             | -                                       | -           | -          | -              | -          | -              | -           | 2           | -           |
| Uncultured <i>Fluviicola</i> sp. clone cuticle_2.22 (HQ111170)                                                                                                 | 98                | -                                       | -           | -          | -              | -          | -              | 4           | -           | -           |
| <b>Bacteroidetes; Sphingobacteria; Sphingobacteriales; Chitinophagaceae &amp; Saprospiraceae</b>                                                               |                   |                                         |             |            |                |            |                |             |             |             |
| Saprospiraceae bacterium clone MS-Wolf2-H (AJ786323) / <i>Haliscomenobacter hydrossis</i> strain DSM 1100 (AJ784892)                                           | 99/98             | -                                       | 6           | -          | 1              | -          | -              | -           | -           | 4           |
| Uncultured bacterium clone 71021-ONK-SLIME-RF4; clone 71021-ONK-SLIME-RF1 (FJ037622; FJ037621) / <i>Haliscomenobacter hydrossis</i> strain DSM 1100 (AJ784892) | 99;99/97          | -                                       | 10          | -          | -              | -          | -              | -           | -           | 11          |
| Uncultured bacterium clone F23 (FJ230926) / Uncultured <i>Haliscomenobacter</i> sp. clone SPS-H30 (AM990052)                                                   | 97/95             | -                                       | -           | -          | -              | -          | -              | -           | 2           | -           |
| Uncultured Bacteroidetes bacterium clone MEsp06cnp11F12 (FJ828234) / Uncultured <i>Haliscomenobacter</i> sp. clone 2G9 (GU074028)                              | 91/86             | -                                       | -           | -          | -              | -          | -              | -           | -           | 4           |
| Uncultured Bacteroidetes clone AS59 (EU283378) / Uncultured Saprospiraceae bacterium clone epr8 (EU177765)                                                     | 99/98             | -                                       | 1           | 1          | -              | -          | -              | 2           | 5           | 6           |

Table S3. Continued

| Organism(s) with highest similarity (GenBank accession no.)<br>classified according to lineage                                              | Similarity<br>(%) | No. of clones per OTU in biofilm sample |             |            |                |            |                |             |             |             |
|---------------------------------------------------------------------------------------------------------------------------------------------|-------------------|-----------------------------------------|-------------|------------|----------------|------------|----------------|-------------|-------------|-------------|
|                                                                                                                                             |                   | BBL<br>t82                              | BMAL<br>t24 | BAP<br>t86 | BMA+<br>AP t24 | BAC<br>t86 | BAC+<br>AP t86 | BGEL<br>t88 | BCAS<br>t82 | BLAM<br>t82 |
| <b>Bacterioidetes; Miscellaneous</b>                                                                                                        |                   |                                         |             |            |                |            |                |             |             |             |
| Uncultured bacterium clone MBR-8_HF_BF48 (FM201200) /<br>Uncultured Bacteroidetes bacterium clone IRD18G07 (AY947969)                       | 99/93             | -                                       | -           | -          | -              | 2          | -              | -           | -           | -           |
| Uncultured bacterium clone 6-37 (HM163138) / Uncultured<br>Bacteroidetes bacterium clone TR1C12 (FJ916091)                                  | 98/93             | -                                       | -           | -          | -              | -          | -              | -           | 2           | -           |
| <b>Chloroflexi; Miscellaneous</b>                                                                                                           |                   |                                         |             |            |                |            |                |             |             |             |
| Uncultured bacterium clone P060905_D09 (HQ385575) / Uncultured<br>Chloroflexi bacterium clone CARS52 (FJ902461)                             | 97/95             | 1                                       | -           | -          | -              | -          | -              | -           | 2           | -           |
| Uncultured bacterium clone HM49 (AM909917) / Uncultured<br>Uncultured Chloroflexi bacterium clone HG-B01104 (JN409095)                      | 99/99             | -                                       | -           | -          | -              | -          | 2              | -           | -           | -           |
| <b>Cyanobacteria; Miscellaneous</b>                                                                                                         |                   |                                         |             |            |                |            |                |             |             |             |
| Uncultured bacterium clone S15D-MN45 (AJ583205) / Uncultured<br>Cyanobacterium clone HrhB65 (AM159280)                                      | 99/88             | 1                                       | -           | -          | -              | 1          | -              | -           | -           | 4           |
| <b>Fibrobacteres/Acidobacteria group; Fibrobacteres &amp; Acidobacteria; Miscellaneous</b>                                                  |                   |                                         |             |            |                |            |                |             |             |             |
| Uncultured bacterium clone HAVOmat06 (EF032778) / Uncultured<br><i>Acidobacterium</i> sp. clone sw-xj104 (GQ302574)                         | 98/98             | -                                       | -           | 2          | -              | -          | -              | -           | -           | -           |
| Uncultured Acidobacteria bacterium clone GASP-MA2S2_H09<br>(EF662908) / Uncultured Firmicutes bacterium clone GASP-<br>KB2S2_F01 (EU298134) | 97/97             | 3                                       | -           | -          | -              | -          | -              | -           | -           | -           |
| Uncultured bacterium clone TX5A_08 (FJ152716) / Uncultured<br>Acidobacteria bacterium clone AMAG3 (AM935828)                                | 98/97             | 2                                       | -           | 2          | -              | -          | -              | -           | -           | -           |
| Uncultured bacterium clone GASP-OKB-629-E07 (EU043666) /<br>Uncultured Acidobacteria bacterium clone KBS_T8_R2_149282_g1<br>(HM061919)      | 97/96             | -                                       | -           | 1          | -              | -          | -              | -           | 2           | -           |
| Uncultured bacterium clone STU23 (EU700165) / Uncultured<br>Acidobacteria bacterium clone AUVE_15D10 (EF651730)                             | 93/94             | -                                       | -           | -          | -              | -          | -              | 3           | -           | -           |

Table S3. Continued

| Organism(s) with highest similarity (GenBank accession no.)<br>classified according to lineage                                 | Similarity<br>(%) | No. of clones per OTU in biofilm sample |             |            |                |            |                |             |             |             |
|--------------------------------------------------------------------------------------------------------------------------------|-------------------|-----------------------------------------|-------------|------------|----------------|------------|----------------|-------------|-------------|-------------|
|                                                                                                                                |                   | BBL<br>t82                              | BMAL<br>t24 | BAP<br>t86 | BMA+<br>AP t24 | BAC<br>t86 | BAC+<br>AP t86 | BGEL<br>t88 | BCAS<br>t82 | BLAM<br>t82 |
| <b>Firmicutes; Miscellaneous</b>                                                                                               |                   |                                         |             |            |                |            |                |             |             |             |
| Uncultured bacterium clone Hb_42(28) (HM534459) / Uncultured<br>Firmicutes bacterium clone GASP-MB1S3_B09 (EF664669)           | 100/98            | -                                       | -           | 2          | -              | -          | -              | -           | -           | -           |
| Uncultured bacterium clone Biofilm_818d_c18 (DQ058684) /<br>Uncultured Firmicutes bacterium clone GASP-KC1S2_G02<br>(EU299215) | 98/97             | -                                       | -           | 2          | -              | -          | -              | -           | -           | -           |
| Uncultured bacterium clone 0702007K01DGUTF1915 (GU369037) /<br>Uncultured Firmicutes bacterium clone A352 (HQ162813)           | 98/97             | -                                       | -           | -          | -              | 2          | -              | -           | -           | -           |
| <b>Gemmatimonadetes; Gemmatimonadetes; (class); Gemmatimonadales; Gemmatimonadaceae</b>                                        |                   |                                         |             |            |                |            |                |             |             |             |
| Uncultured bacterium clone AA142 (GQ859798) / Uncultured<br>Gemmatimonadetes bacterium clone AMFC3 (AM935288)                  | 95/95             | -                                       | -           | -          | -              | -          | -              | -           | 1           | 1           |
| <b>Nitrospirae; Nitrospira; Nitrospirales; Nitrospiraceae</b>                                                                  |                   |                                         |             |            |                |            |                |             |             |             |
| Uncultured bacterium clone Inlet_March02_c17 (DQ058674) /<br>Uncultured <i>Nitrospira</i> sp. clone Jy04A40 (AB591407)         | 99/98             | 7                                       | 1           | 4          | -              | 3          | -              | 4           | 7           | 9           |
| Uncultured bacterium clone pLW-66 (DQ067038) / Uncultured<br><i>Nitrospira</i> sp. clone Jy04A40 (AB591407)                    | 99/99             | 1                                       | -           | 7          | -              | 2          | 3              | 5           | 1           | -           |
| Uncultured bacterium clone KA613O121 (HM445534) / Uncultured<br><i>Nitrospira</i> sp. clone GASP-MA4S1_A06                     | 99/99             | 1                                       | -           | 1          | -              | -          | -              | -           | -           | -           |
| Uncultured bacterium clone TA3_51 (EU746700) / Uncultured<br><i>Nitrospira</i> sp. clone Jy04A32 (AB591401)                    | 99/99             | 1                                       | -           | 3          | -              | 1          | -              | 5           | -           | 1           |
| Uncultured Nitrospirae bacterium clone 167 (AB252937) / Uncultured<br><i>Nitrospira</i> sp. clone Jy04A34 (AB591403)           | 99/99             | -                                       | 1           | -          | 1              | -          | -              | -           | -           | 1           |
| Uncultured bacteria clone c13 (FN687453) / Uncultured <i>Nitrospira</i> sp.<br>clone 3 (DQ414437)                              | 99/99             | -                                       | -           | -          | -              | -          | -              | 2           | -           | -           |



Table S3. Continued

| Organism(s) with highest similarity (GenBank accession no.)<br>classified according to lineage                                      | Similarity<br>(%) | No. of clones per OTU in biofilm sample |             |            |                |            |                |             |             |             |
|-------------------------------------------------------------------------------------------------------------------------------------|-------------------|-----------------------------------------|-------------|------------|----------------|------------|----------------|-------------|-------------|-------------|
|                                                                                                                                     |                   | BBL<br>t82                              | BMAL<br>t24 | BAP<br>t86 | BMA+<br>AP t24 | BAC<br>t86 | BAC+<br>AP t86 | BGEL<br>t88 | BCAS<br>t82 | BLAM<br>t82 |
| Uncultured bacterium clone MACA-RR18 (GQ500753) / Uncultured<br><i>Nitrospira</i> sp. clone Jy04A40 (AB591407)                      | 99/99             | -                                       | -           | -          | -              | -          | -              | -           | 4           | -           |
| <b>Planctomycetes; Miscellaneous</b>                                                                                                |                   |                                         |             |            |                |            |                |             |             |             |
| Uncultured planctomycete clone GASP-WB1W2_B12 (EF073662) /<br>Uncultured <i>Gemmata</i> sp. clone OTU33/APA (AM902601)              | 90/89             | 2                                       | -           | -          | -              | -          | -              | -           | -           | -           |
| Uncultured <i>Pirellula</i> sp. clone Ivry3 (FJ236060)                                                                              | 99                | -                                       | -           | 1          | -              | -          | 1              | -           | -           | -           |
| Uncultured bacterium clone TG_FD_0.7_May_09_B109 (HQ532961) /<br>Uncultured <i>Planctomyces</i> sp. clone Joinville4 (FJ236055)     | 99/95             | 1                                       | 1           | -          | -              | -          | -              | -           | -           | -           |
| Uncultured Crater Lake bacterium CL500-4 (AF316776) /<br>Uncultured <i>Planctomyces</i> sp. clone S3-41 (HQ674917)                  | 99/90             | 3                                       | -           | -          | -              | -          | -              | -           | -           | 2           |
| Uncultured Planctomycetes bacterium clone QEDN8AH04 (CU927823)<br>/ Uncultured <i>Planctomyces</i> sp. clone B07-08B (FJ543033)     | 90/90             | -                                       | -           | -          | -              | -          | -              | 1           | -           | 1           |
| <b>Proteobacteria; <math>\alpha</math>-Proteobacteria; Rhizobiales; Hyphomicrobiaceae &amp; Rhizobiaceae</b>                        |                   |                                         |             |            |                |            |                |             |             |             |
| Uncultured bacterium clone AS253O1O5 (HM445062) / Uncultured<br><i>Pedomicrobium</i> sp. clone GASP-KC3S1_H03 (EU300117)            | 99/97             | 2                                       | -           | -          | -              | -          | -              | -           | -           | -           |
| Uncultured alpha proteobacterium clone b10-4 (FN594639) /<br>Uncultured <i>Pedomicrobium</i> sp. clone GASP-KB1W3_G11<br>(EU297964) | 98/98             | 1                                       | -           | -          | -              | 1          | -              | -           | -           | -           |
| Uncultured bacterium clone GP28366hO3 (HM445358) /<br><i>Pedomicrobium manganicum</i> strain ATCC 33121 (GU269549)                  | 98/98             | 2                                       | -           | -          | -              | -          | -              | -           | 1           | 1           |
| Uncultured bacterium clone MACA-EFT23 (GQ500792) / Uncultured<br><i>Hyphomicrobium</i> sp. clone ENR16 (FJ536923)                   | 97/95             | 1                                       | -           | -          | -              | -          | -              | -           | 1           | -           |
| Uncultured alpha proteobacterium clone QEDN1CF08 (CU927121) /<br><i>Hyphomicrobium</i> sp. Is-B219 (EF35007)                        | 95/96             | -                                       | -           | -          | -              | 1          | -              | 2           | 1           | 1           |

Table S3. Continued

| Organism(s) with highest similarity (GenBank accession no.)<br>classified according to lineage                                                                                                          | Similarity<br>(%) | No. of clones per OTU in biofilm sample |             |            |                |            |                |             |             |             |
|---------------------------------------------------------------------------------------------------------------------------------------------------------------------------------------------------------|-------------------|-----------------------------------------|-------------|------------|----------------|------------|----------------|-------------|-------------|-------------|
|                                                                                                                                                                                                         |                   | BBL<br>t82                              | BMAL<br>t24 | BAP<br>t86 | BMA+<br>AP t24 | BAC<br>t86 | BAC+<br>AP t86 | BGEL<br>t88 | BCAS<br>t82 | BLAM<br>t82 |
| Uncultured bacterium clone MP104-SW-b25 (DQ088788) /<br>Uncultured <i>Hyphomicrobium</i> sp. clone YJQ-3 (AY569281)                                                                                     | 99/99             | -                                       | -           | 1          | -              | 4          | 2              | -           | -           | -           |
| Uncultured bacterium clone MACA-EFT28 (GQ500796) /<br><i>Hyphomicrobium</i> sp. clone as1-44 (GU257506)                                                                                                 | 96/95             | -                                       | -           | 1          | -              | -          | -              | 2           | -           | -           |
| Uncultured Hyphomicrobiaceae bacterium clone GASP_WA2W3_G08<br>(EF073040) / Uncultured <i>Rhizobium</i> sp. clone Cvi68 (FJ12876) /<br><i>Devosia</i> sp. strain P-39; strain P-37 (AM411922; AM411923) | 99/98/<br>98;98   | -                                       | 9           | 1          | 1              | -          | -              | 2           | -           | 1           |
| Uncultured Hyphomicrobiaceae bacterium clone Elev_16S_1899<br>(EF020323) / Uncultured <i>Rhodoplanes</i> sp. clone CMME11<br>(AM935954)                                                                 | 99/98             | -                                       | -           | 2          | -              | -          | -              | -           | -           | -           |
| <b>Proteobacteria; <math>\alpha</math>-Proteobacteria; Rhizobiales; Miscellaneous</b>                                                                                                                   |                   |                                         |             |            |                |            |                |             |             |             |
| Uncultured bacterium clone ar1g416 (HM921128) / Uncultured<br><i>Nitratireductor</i> sp. clone CL3.D14 (FM175760)                                                                                       | 100/99            | 1                                       | -           | 3          | -              | -          | -              | 1           | 1           | -           |
| Uncultured Rhizobiales bacterium clone AMGE5 (AM935400) /<br>Uncultured <i>Parvularcula</i> sp. clone REG_R2P5_D3 (FJ933364)                                                                            | 99/95             | -                                       | -           | -          | -              | -          | -              | 3           | 2           | -           |
| Uncultured bacterium clone RRB034 (EU284540) / Uncultured<br><i>Methylocapsa</i> sp. clone CL2.C17 (FM175364)                                                                                           | 99/98             | -                                       | -           | -          | -              | -          | -              | -           | 2           | -           |
| Uncultured $\alpha$ -proteobacterium clone Br_42 (26) (HM534221) /<br>Uncultured Rhizobiales clone A6_100 (AM940599)                                                                                    | 99/98             | 2                                       | -           | -          | -              | -          | -              | -           | -           | -           |
| <b>Proteobacteria; <math>\alpha</math>-Proteobacteria; Sphingomonadales; Sphingomonadaceae</b>                                                                                                          |                   |                                         |             |            |                |            |                |             |             |             |
| Uncultured bacterium clone DUP6D09 (HQ178928) / <i>Sphingomonas</i> sp.<br>clone DOL79 (HM224434) / <i>Sphingopyxis</i> sp. clone 03SUJ8<br>(HQ436495)                                                  | 99/98/98          | -                                       | -           | -          | -              | -          | -              | 4           | -           | 2           |
| Uncultured bacterium clone L2-10 (HM460661) / <i>Sphingopyxis</i> sp.<br>clone 03SUJ8 (HQ436495) / <i>Sphingomonas</i> sp. P1S1 (AJ620198)                                                              | 98/98/98          | -                                       | -           | -          | -              | -          | -              | -           | 3           | -           |

Table S3. Continued

| Organism(s) with highest similarity (GenBank accession no.)<br>classified according to lineage                                                                                | Similarity<br>(%) | No. of clones per OTU in biofilm sample |             |            |                |            |                |             |             |             |
|-------------------------------------------------------------------------------------------------------------------------------------------------------------------------------|-------------------|-----------------------------------------|-------------|------------|----------------|------------|----------------|-------------|-------------|-------------|
|                                                                                                                                                                               |                   | BBL<br>t82                              | BMAL<br>t24 | BAP<br>t86 | BMA+<br>AP t24 | BAC<br>t86 | BAC+<br>AP t86 | BGEL<br>t88 | BCAS<br>t82 | BLAM<br>t82 |
| <b>Proteobacteria; <math>\alpha</math>-Proteobacteria; Miscellaneous</b>                                                                                                      |                   |                                         |             |            |                |            |                |             |             |             |
| Uncultured $\alpha$ -proteobacterium clone FTL75 (AF529112) / <i>Caedibacter caryophila</i> BGD19 (AJ238683)                                                                  | 98/92             | -                                       | -           | -          | -              | -          | 2              | -           | 1           | -           |
| Uncultured bacterium clone MBR-30_LF_AS77 (FM200963) /<br>Uncultured $\alpha$ -proteobacterium clone PSB011.C21_D24 (GU300176)                                                | 96/94             | 3                                       | -           | 1          | -              | -          | -              | -           | -           | -           |
| Uncultured bacterium clone L65 (EU834774) / $\alpha$ -proteobacterium<br>ASRW6-4 (AB299782)                                                                                   | 98/97             | -                                       | -           | -          | -              | -          | 2              | -           | -           | -           |
| <b>Proteobacteria; <math>\beta</math>-Proteobacteria; Burkholderiales; Burkholderiaceae</b>                                                                                   |                   |                                         |             |            |                |            |                |             |             |             |
| Uncultured bacterium clone 298EGG26 (FJ593728) / <i>Ralstonia solanacearum</i> strain LYP (HQ1766322)                                                                         | 99/98             | 4                                       | -           | -          | -              | -          | 1              | -           | -           | 2           |
| Uncultured bacterium clone IS-56 (GQ339155) / Uncultured<br>Burkholderiaceae bacterium clone Elev_16S_775 (EF019630)                                                          | 99/98             | -                                       | 1           | -          | -              | -          | 1              | -           | -           | -           |
| <b>Proteobacteria; <math>\beta</math>-Proteobacteria; Burkholderiales; Comamonadaceae</b>                                                                                     |                   |                                         |             |            |                |            |                |             |             |             |
| Uncultured bacterium clone cs-62 (HQ115556) / <i>Hydrogenophaga defluvii</i> strain hyd1 (AM942546)                                                                           | 99/98             | -                                       | 2           | 1          | 7              | -          | -              | -           | -           | -           |
| Uncultured Comamonadaceae bacterium clone GC1m-3-13 (EU641295)<br>/ <i>Hydrogenophaga caeni</i> strain EMB71 (DQ372983)                                                       | 99/99             | -                                       | -           | -          | 4              | 3          | 6              | -           | -           | 1           |
| Uncultured Comamonadaceae bacterium clone GC12m-3-55<br>(EU641050) / <i>Hydrogenophaga</i> sp. EMB75 (DQ413154)                                                               | 97/96             | -                                       | -           | -          | -              | 2          | -              | -           | -           | -           |
| Uncultured bacterium clone MA101C05 (FJ694402) / Uncultured<br><i>Rhodoferrax</i> sp. clone CL4.E36 (FM175916)                                                                | 99/99             | -                                       | 2           | -          | 1              | 7          | 13             | -           | -           | -           |
| <i>Rhodoferrax</i> sp. Asd M2A1 (FM955857)                                                                                                                                    | 97                | -                                       | -           | -          | -              | -          | 1              | -           | -           | 1           |
| Uncultured Burkholderiales bacterium clone con40-3 (FJ517721) /<br><i>Curvibacter</i> sp. HME6817 (HQ167730) / Uncultured <i>Rhodoferrax</i> sp.<br>Clone spike_1 (HQ1111491) | 99/99/99          | -                                       | -           | -          | 2              | -          | -              | -           | -           | -           |

Table S3. Continued

| Organism(s) with highest similarity (GenBank accession no.)<br>classified according to lineage                                                                                                                        | Similarity (%) | No. of clones per OTU in biofilm sample |          |         |             |         |             |          |          |          |
|-----------------------------------------------------------------------------------------------------------------------------------------------------------------------------------------------------------------------|----------------|-----------------------------------------|----------|---------|-------------|---------|-------------|----------|----------|----------|
|                                                                                                                                                                                                                       |                | BBL t82                                 | BMAL t24 | BAP t86 | BMA+ AP t24 | BAC t86 | BAC+ AP t86 | BGEL t88 | BCAS t82 | BLAM t82 |
| Bacterium IRO1 (AY928215) / <i>Curvibacter</i> sp. IPC7 (HQ108174) /<br>Uncultured <i>Rhodofera</i> sp. clone AL_35 (HQ008554)                                                                                        | 99/98/98       | -                                       | -        | -       | -           | 1       | 2           | -        | -        | -        |
| Uncultured $\beta$ -proteobacterium clone LNA_100608-96 (HM037382) /<br><i>Curvibacter</i> sp. ATCC 700892 (HM357758) / <i>Aquamonas fontana</i><br>strain AQ11 (AB120965)                                            | 99/99/99       | -                                       | -        | -       | -           | 1       | 2           | -        | -        | -        |
| Glacier bacterium FXS1 (AY315177) / Uncultured <i>Polaromonas</i> sp.<br>clone IC3028 (HQ595202)                                                                                                                      | 99/99          | -                                       | -        | -       | -           | 3       | 1           | -        | -        | -        |
| Uncultured bacterium clone EpiUMB27 (FJ849279) / Uncultured<br><i>Polaromonas</i> sp. clone B6_50; B6_25 (AM940813; AM940793)                                                                                         | 97/96          | -                                       | -        | -       | -           | 4       | 1           | -        | -        | -        |
| Uncultured $\beta$ -proteobacterium clone 0G8 (EU499554) / Uncultured<br><i>Comamonas</i> sp. R15-4; R15-54 clone (JF808871; JF808872)                                                                                | 99/99/99       | -                                       | -        | -       | -           | 1       | 1           | -        | -        | -        |
| Uncultured <i>Ottowia</i> sp. clone CL2.C46 (FM175385)                                                                                                                                                                | 97             | -                                       | -        | -       | -           | 1       | 1           | -        | 2        | -        |
| Uncultured bacterium clone pLW-2 (DQ066963) / <i>Leptothrix</i><br><i>ginsengisoli</i> strain OTSz_A_210 (FM886840)                                                                                                   | 99/98          | -                                       | -        | -       | -           | -       | 1           | -        | -        | 1        |
| <b>Proteobacteria; <math>\beta</math>-Proteobacteria; Burkholderiales; Oxalobacteraceae &amp; unclassified Burkholderiales</b>                                                                                        |                |                                         |          |         |             |         |             |          |          |          |
| Uncultured $\beta$ -proteobacterium clone A9 (AJ867902) / <i>Undibacterium</i><br>sp. HME6890 (HQ665007)                                                                                                              | 99/98          | -                                       | -        | -       | -           | -       | -           | 2        | -        | -        |
| Uncultured bacterium clone 1-60 (HM163102) / Uncultured<br>Oxalobacteraceae bacterium clone AMJD9 (AM934886)                                                                                                          | 98/95          | -                                       | -        | 3       | -           | -       | -           | -        | -        | -        |
| Uncultured bacterium clone MBR-8_HF_AS40 (FM201235) /<br>Oxalobacteraceae NR164 (DQ520826)                                                                                                                            | 99/91          | -                                       | -        | -       | -           | -       | 2           | -        | -        | -        |
| <b>Proteobacteria; <math>\beta</math>-Proteobacteria; Rhodocyclales; Rhodocyclaceae</b>                                                                                                                               |                |                                         |          |         |             |         |             |          |          |          |
| Uncultured $\beta$ -proteobacterium clone GASP-MA4W2_B12 (EF664309) /<br>Uncultured Rhodocyclaceae bacterium clone Amb_16S_1454<br>(EF018945) / Uncultured Burkholderiaceae bacterium clone<br>Amb_16S_495 (EF018160) | 100/98/98      | 1                                       | -        | 1       | -           | -       | -           | -        | -        | 1        |

Table S3. Continued

| Organism(s) with highest similarity (GenBank accession no.)<br>classified according to lineage                                                                                    | Similarity<br>(%) | No. of clones per OTU in biofilm sample |             |            |                |            |                |             |             |             |
|-----------------------------------------------------------------------------------------------------------------------------------------------------------------------------------|-------------------|-----------------------------------------|-------------|------------|----------------|------------|----------------|-------------|-------------|-------------|
|                                                                                                                                                                                   |                   | BBL<br>t82                              | BMAL<br>t24 | BAP<br>t86 | BMA+<br>AP t24 | BAC<br>t86 | BAC+<br>AP t86 | BGEL<br>t88 | BCAS<br>t82 | BLAM<br>t82 |
| Uncultured Rhodocyclaceae bacterium clone B-UP-T0_OTU10<br>(FM204987) / <i>Dechloromonas aromatica</i> RCB (CP000089) /<br><i>Ferribacterium limneticum</i> strain cda-1 (Y17060) | 99/99/99          | -                                       | -           | -          | -              | 7          | 1              | -           | -           | -           |
| Uncultured bacterium clone DUR_11 (EF565162) / <i>Azospira restricta</i><br>strain SUA2 (DQ974114)                                                                                | 98/97             | -                                       | -           | -          | -              | -          | 3              | -           | -           | -           |
| <b>Proteobacteria; <math>\beta</math>-Proteobacteria; Miscellaneous</b>                                                                                                           |                   |                                         |             |            |                |            |                |             |             |             |
| Uncultured bacterium clone Field-198 (EU499698) / Uncultured<br><i>Methylibium</i> sp. clone GASP-KC2W1_E01 (EU299892)                                                            | 98/98             | 2                                       | -           | -          | -              | -          | -              | -           | -           | -           |
| Uncultured <i>Thiobacillus</i> sp. clone 25-91-ArvAB (AB425068)                                                                                                                   | 99                | -                                       | 2           | -          | -              | -          | -              | -           | -           | -           |
| <b>Proteobacteria; <math>\gamma</math>-Proteobacteria; Alteromonadales; Alteromonadaceae</b>                                                                                      |                   |                                         |             |            |                |            |                |             |             |             |
| Uncultured bacterium clone 0702002P16BMCFH8850 (GU369524) /<br><i>Microbulbifer</i> sp. Th/B/38 (AY224196)                                                                        | 98/88             | -                                       | -           | -          | -              | -          | -              | 5           | -           | 1           |
| <b>Proteobacteria; <math>\gamma</math>-Proteobacteria; Legionellales; Coxiellaceae &amp; Legionellaceae</b>                                                                       |                   |                                         |             |            |                |            |                |             |             |             |
| Uncultured bacterium clone Toolik_Jun2005_shruborg_73 (DQ509966)<br>/ <i>Legionella oakridgensis</i> (AB571648)                                                                   | 95/86             | -                                       | -           | 1          | -              | -          | -              | -           | -           | 1           |
| <b>Proteobacteria; <math>\gamma</math>-Proteobacteria; Pseudomonadales; Pseudomonadaceae</b>                                                                                      |                   |                                         |             |            |                |            |                |             |             |             |
| Uncultured bacterium clone ncd266b09c1 (HM270455) / <i>Cellvibrio</i> sp.<br>KY-CR-1 (EF692633)                                                                                   | 96/95             | -                                       | 16          | 1          | 28             | -          | -              | -           | -           | -           |
| Uncultured bacterium clone lmu-b143 (JN023132) / <i>Cellvibrio</i> sp. KY-<br>YJ-3 (EF692636)                                                                                     | 96/96             | -                                       | 7           | -          | 16             | -          | 1              | -           | -           | -           |
| Uncultured bacterium clone StLS75 (EU219027) / Uncultured<br><i>Cellvibrio</i> sp. clone Plot18-B10 (FJ889293)                                                                    | 98/96             | -                                       | -           | -          | -              | -          | -              | -           | -           | 2           |

Table S3. Continued

| Organism(s) with highest similarity (GenBank accession no.)<br>classified according to lineage                                                | Similarity<br>(%) | No. of clones per OTU in biofilm sample |             |            |                |            |                |             |             |             |
|-----------------------------------------------------------------------------------------------------------------------------------------------|-------------------|-----------------------------------------|-------------|------------|----------------|------------|----------------|-------------|-------------|-------------|
|                                                                                                                                               |                   | BBL<br>t82                              | BMAL<br>t24 | BAP<br>t86 | BMA+<br>AP t24 | BAC<br>t86 | BAC+<br>AP t86 | BGEL<br>t88 | BCAS<br>t82 | BLAM<br>t82 |
| <b>Proteobacteria; <math>\gamma</math>-Proteobacteria; Thiotrichales; Thiostreptaceae</b>                                                     |                   |                                         |             |            |                |            |                |             |             |             |
| Uncultured bacterium clone V201-103 (HQ114118) / Uncultured<br><i>Beggiatoa</i> sp. clone CL5.H29 (FM176297)                                  | 99/95             | -                                       | 1           | 1          | -              | -          | -              | -           | -           | -           |
| Uncultured bacterium clone GP27685f11 (HM445483) / Uncultured<br><i>Beggiatoa</i> sp. clone CL5.H29 (FM176297)                                | 99/96             | -                                       | -           | 1          | -              | 1          | -              | -           | -           | -           |
| Uncultured bacterium clone cs-12 (HQ115542) / <i>Thiothrix</i><br><i>fructosivorans</i> strain Q (GU269554)                                   | 99/99             | -                                       | -           | -          | -              | 12         | 7              | -           | -           | -           |
| <b>Proteobacteria; <math>\gamma</math>-Proteobacteria; Xanthomonadales; Xanthomonadaceae</b>                                                  |                   |                                         |             |            |                |            |                |             |             |             |
| Uncultured bacterium clone AK1DE2_11A (GQ397024) / Uncultured<br><i>Lysobacter</i> sp. clone MKT-G24 (AM990045)                               | 100/98            | -                                       | -           | -          | -              | -          | -              | 2           | 7           | -           |
| Uncultured $\gamma$ -proteobacterium clone QEDN8DD06 (CU926385) /<br>Uncultured Xanthomonadaceae bacterium clone GASP-MA4S2_C04<br>(EF664034) | 99/96             | -                                       | -           | -          | -              | -          | -              | 1           | 1           | -           |
| Uncultured bacterium clone DP3.5.36 (FJ612198) / Uncultured <i>Dyella</i><br>sp. clone CL6-7.L193 (FM176830)                                  | 99/99             | -                                       | -           | -          | -              | -          | -              | -           | 2           | -           |
| <b>Proteobacteria; <math>\gamma</math>-Proteobacteria; Miscellaneous</b>                                                                      |                   |                                         |             |            |                |            |                |             |             |             |
| Uncultured bacterium clone SS_LKC22_UB116 (AM490696) /<br>Uncultured $\gamma$ -proteobacterium clone SM1D02 (AF445671)                        | 87/85             | -                                       | -           | 5          | -              | -          | -              | -           | -           | -           |
| Uncultured bacterium clone 6134Rh (GU201120) / Uncultured $\gamma$ -<br>proteobacterium clone LHCHWD146 (GU016234)                            | 97/96             | -                                       | -           | -          | -              | -          | -              | 2           | -           | -           |
| <b>Proteobacteria; <math>\delta</math>-Proteobacteria; Myxococcales</b>                                                                       |                   |                                         |             |            |                |            |                |             |             |             |
| Uncultured Polyangiaceae bacterium clone cuticle_16 (HQ111161)                                                                                | 98                | -                                       | -           | -          | -              | 1          | -              | -           | -           | 1           |

Table S3. Continued

| Organism(s) with highest similarity (GenBank accession no.)<br>classified according to lineage                    | Similarity<br>(%) | No. of clones per OTU in biofilm sample |             |            |                |            |                |             |             |             |
|-------------------------------------------------------------------------------------------------------------------|-------------------|-----------------------------------------|-------------|------------|----------------|------------|----------------|-------------|-------------|-------------|
|                                                                                                                   |                   | BBL<br>t82                              | BMAL<br>t24 | BAP<br>t86 | BMA+<br>AP t24 | BAC<br>t86 | BAC+<br>AP t86 | BGEL<br>t88 | BCAS<br>t82 | BLAM<br>t82 |
| <b>Proteobacteria; <math>\delta</math>-Proteobacteria; Miscellaneous</b>                                          |                   |                                         |             |            |                |            |                |             |             |             |
| Uncultured bacterium clone ORSFAM_h07 (EF393289) / Uncultured<br><i>Desulfofustis</i> sp. clone CL5.H8 (FM176284) | 96/96             | -                                       | -           | 2          | -              | -          | -              | -           | -           | -           |
| <b>Unidentified Bacteria; Miscellaneous</b>                                                                       |                   |                                         |             |            |                |            |                |             |             |             |
| Uncultured bacterium clone Crozet_s_864 (FM214345)                                                                | 91                | -                                       | -           | 2          | -              | -          | -              | -           | -           | -           |
| Uncultured organism clone Jsed45 (GQ994853) / Uncultured bacterium<br>clone MBIOS-06 (EU369122)                   | 87/85             | -                                       | -           | 3          | -              | -          | -              | -           | -           | 5           |

Table S4. Identity of dominant bacterial strains isolated from biofilms formed with tap water with added maltose (BMAL), amylopectin (BAP), maltose & amylopectin (BMA+AP), acetate (BAC), acetate and amylopectin (BAC+AP), gelatin (BGEL), caseinate (BCAS), or laminarin (BLAM) at  $\mu\text{g C l}^{-1}$  levels. Symbols: +, isolated from biofilm; -, not isolated from biofilm.

| Strain no.                                                                                   | Organism(s) with highest similarity (GenBank accession no.)<br>classified according to lineage                        | Similarity<br>(%) | Biofilm |     |            |      |      |      |
|----------------------------------------------------------------------------------------------|-----------------------------------------------------------------------------------------------------------------------|-------------------|---------|-----|------------|------|------|------|
|                                                                                              |                                                                                                                       |                   | BMAL    | BAP | BMA+<br>AP | BGEL | BCAS | BLAM |
| <b>Bacteroidetes; Flavobacteria; Flavobacteriales; Flavobacteriaceae</b>                     |                                                                                                                       |                   |         |     |            |      |      |      |
| BF-BP1                                                                                       | <i>Flavobacterium</i> sp. HME6012 (HM149211)                                                                          | 99                | +       | +   | +          | -    | -    | -    |
| BF-BP2                                                                                       | Uncultured <i>Flavobacterium</i> sp. clone L-1 (JF703584)                                                             | 99                | -       | -   | -          | +    | +    | -    |
| BF-BP3                                                                                       | Uncultured bacterium clone ncd555e08c1 (HM278469) /<br><i>Flavobacterium columnare</i> strain Ga-6-93 (AY842901)      | 99/98             | -       | -   | -          | -    | +    | -    |
| BF-BP4                                                                                       | <i>Flavobacterium</i> sp. HME6133 (HM776988) / <i>Flavobacterium aquatile</i><br>NBRC 15052 (AB517711)                | 98/97             | -       | -   | -          | -    | +    | -    |
| BF-BP5                                                                                       | <i>Flavobacterium</i> sp. CL1.152 (AM934685) / <i>Flavobacterium</i><br><i>succinicans</i> strain DSM 4003 (AM230493) | 99                | -       | -   | -          | -    | -    | +    |
| BF-BP6                                                                                       | <i>Flavobacterium</i> sp. R-36233 (FR682719)                                                                          | 98                | -       | -   | -          | -    | -    | +    |
| <b>Proteobacteria; <math>\alpha</math>-Proteobacteria; Caulobacterales; Caulobacteraceae</b> |                                                                                                                       |                   |         |     |            |      |      |      |
| BF-BP7                                                                                       | <i>Brevundimonas</i> sp. strain AKB-20080JO103 (AM988997)                                                             | 99                | -       | -   | -          | +    | +    | -    |
| BF-BP8                                                                                       | <i>Caulobacter</i> sp. tsz32 (FJ979860) / <i>Brevundimonas</i> sp. strain AKB-<br>20080JO103 (AM988997)               | 99/99             | -       | -   | -          | +    | -    | -    |
| <b>Proteobacteria; <math>\beta</math>-Proteobacteria; Burkholderiales; Oxalobacteraceae</b>  |                                                                                                                       |                   |         |     |            |      |      |      |
| BF-BP9                                                                                       | Uncultured $\beta$ -proteobacterium clone A9 (AJ867902) / <i>Undibacterium</i><br>sp. HME6890 (HQ665007)              | 99/98             | -       | -   | -          | +    | -    | -    |



Table S4. Continued

| Strain no.                                                                                   | Organism(s) with highest similarity (GenBank accession no.)<br>classified according to lineage                     | Similarity<br>(%) | Biofilm |     |            |      |      |      |
|----------------------------------------------------------------------------------------------|--------------------------------------------------------------------------------------------------------------------|-------------------|---------|-----|------------|------|------|------|
|                                                                                              |                                                                                                                    |                   | BMAL    | BAP | BMA+<br>AP | BGEL | BCAS | BLAM |
| <b>Proteobacteria; <math>\gamma</math>-Proteobacteria; Pseudomonadales; Pseudomonadaceae</b> |                                                                                                                    |                   |         |     |            |      |      |      |
| BF-BP10                                                                                      | Uncultured bacterium clone ncd266b09c1 (HM270455) / <i>Cellvibrio</i> sp. KY-CR-1 (EF692633)                       | 96/95             | +       | -   | +          | -    | -    | -    |
| BF-BP11                                                                                      | Uncultured bacterium clone lmu-b143 (JN023132) / <i>Cellvibrio</i> sp. KY-YJ-3 (EF692636)                          | 96/96             | +       | -   | +          | -    | -    | -    |
| <b>Proteobacteria; <math>\gamma</math>-Proteobacteria; Xanthomonadales; Xanthomonadaceae</b> |                                                                                                                    |                   |         |     |            |      |      |      |
| BF-BP12                                                                                      | Uncultured bacterium clone AK1DE2_11A (GQ397024) / Uncultured <i>Lysobacter</i> sp. clone MKT-G24 (AM990045)       | 100/98            | -       | -   | -          | +    | -    | -    |
| BF-BP13                                                                                      | Uncultured bacterium clone ncd2676d01c1 (JF232474) / Uncultured <i>Xanthomonas</i> sp. clone AUVE_10A09 (EF651335) | 100/100           | -       | -   | -          | -    | +    | -    |
| BF-BP14                                                                                      | <i>Lysobacter</i> sp. RB64 (FJ898299) / <i>Lysobacter daecheongensis</i> (AB249682)                                | 99/99             | -       | -   | -          | +    | +    | -    |
